# Supplementary material
Source: PubMed Central journal article supplement (PMC3262656)
Supplement: supp_46.1.14_Yeager_ODS.pdf [file supp_46.1.14_Yeager_ODS.pdf]

## **Endothelin-1, the Unfolded Protein Response, and Persistent Inflammation-Role of Pulmonary Artery Smooth Muscle Cells**

Michael E. Yeager<sup>1</sup>, Dmitry D. Belchenko<sup>1</sup>, Cecilia M. Nguyen<sup>2</sup>, Kelley L. Colvin<sup>3</sup>, D. Dunbar Ivy<sup>3</sup>, K.R. Stenmark<sup>1,4,5</sup>

**Supplemental Figure 1** (A-B) The response of PASMC from ETBR deficient rats to ET-1 mirrors BQ788 pharmacologic inhibition of ETB in wild type rat PASMC. (A) Densitometry of pERK-1/2 Immunoblot and (B) XBP-1 splicing in PASMC derived from ETB deficient rats show similar results compared to ETB inhibition in wild type PASMC as shown in Figure 1C and Figure 3, respectively. (C) ET-1 activation of the ATF6 and IRE-1 pathways of the UPR does not induce wild type PASMC apoptosis as measured by trypan blue exclusion (left) and immunoblot for activated caspase-3 (right).
